# Supplementary material for: The potential use of antifungal essential oil volatiles to manage citrus decay during degreening
Source: Research Square preprint supplement (doi:10.21203/rs.3.rs-4130037/v1), 2024-03-26
Supplement: Supplementary file 1 [file c87e735b9291c10ffbd9cdb5.docx]

**Supplementary Tables and Figures**

| **Supplementary Table 1** ANOVA of the percentage inhibition of the mycelial growth of *Penicillium digitatum* | | | | | | |
| --- | --- | --- | --- | --- | --- | --- |
|  | **Degrees of Freedom** | **Sum of Squares** | **Mean of Squares** | **F-value** | **Pr(>F)** | **Significance value** |
| **Treatment** | 60 | 450555 | 7509 | 76.767 | <2e-16 | < 0.05 |
| **Trial** | 1 | 339 | 339 | 3.47 | 0.0637 | = 0.05 |
| **Treatment:Trial** | 60 | 8433 | 141 | 1.437 | 0.0302 | < 0.05 |
| **Residuals** | 242 | 23672 | 98 |  |  |  |

| **Supplementary Table 2** ANOVA of the percentage inhibition of the mycelial growth of *Galactomyces citri-aurantii* | | | | | | |
| --- | --- | --- | --- | --- | --- | --- |
|  | **Degrees of Freedom** | **Sum of Squares** | **Mean of Squares** | **F-value** | **Pr(>F)** | **Significance value** |
| **Treatment** | 60 | 626485 | 10441 | 168.183 | <2e-16 | < 0.05 |
| **Trial** | 1 | 18883 | 18883 | 304.161 | <2e-16 | < 0.05 |
| **Treatment:Trial** | 60 | 19189 | 320 | 5.151 | <2e-16 | < 0.05 |
| **Residuals** | 241 | 14962 | 62 |  |  |  |

| **Supplementary Table 3** ANOVA of the percentage inhibition of spore germination of *Penicillium digitatum* as a result of exposure to essential oil volatiles for 3 days | | | | | | |
| --- | --- | --- | --- | --- | --- | --- |
|  | **Degrees of Freedom** | **Sum of Squares** | **Mean of Squares** | **F-value** | **Pr(>F)** | **Significance value** |
| **Treatment** | 10 | 64690 | 6469 | 42.614 | <2e-16 | < 0.05 |
| **Trial** | 1 | 69 | 69 | 0.456 | 0.503 | > 0.05 |
| **Treatment:Trial** | 10 | 639 | 64 | 0.421 | 0.929 | > 0.05 |
| **Residuals** | 44 | 6679 | 152 |  |  |  |

| **Supplementary Table 4** ANOVA of the percentage inhibition of spore germination of *Galactomyces citri-aurantii* as a result of exposure to essential oil volatiles for 3 days | | | | | | |
| --- | --- | --- | --- | --- | --- | --- |
|  | **Degrees of Freedom** | **Sum of Squares** | **Mean of Squares** | **F-value** | **Pr(>F)** | **Significance value** |
| **Treatment** | 10 | 56659 | 5666 | 43.583 | <2e-16 | < 0.05 |
| **Trial** | 1 | 479 | 479 | 3.685 | 0.0614 | = 0.05 |
| **Treatment:Trial** | 10 | 1401 | 140 | 1.078 | 0.3991 | > 0.05 |
| **Residuals** | 44 | 5720 | 130 |  |  |  |

| **Supplementary Table 5** ANOVA of the percentage inhibition of spore germination of *Penicillium digitatum* 11 days after a 3-day essential oil volatile exposure period | | | | | | |
| --- | --- | --- | --- | --- | --- | --- |
|  | **Degrees of Freedom** | **Sum of Squares** | **Mean of Squares** | **F-value** | **Pr(>F)** | **Significance value** |
| **Treatment** | 10 | 64019 | 6402 | 36.475 | <2e-16 | < 0.05 |
| **Trial** | 1 | 166 | 166 | 0.947 | 0.336 | > 0.05 |
| **Treatment:Trial** | 10 | 302 | 30 | 0.172 | 0.997 | > 0.05 |
| **Residuals** | 44 | 7723 | 176 |  |  |  |

| **Supplementary Table 6** ANOVA of the percentage inhibition of spore germination of *Galactomyces citri-aurantii* 11 days after a 3-day essential oil volatile exposure period | | | | | | |
| --- | --- | --- | --- | --- | --- | --- |
|  | **Degrees of Freedom** | **Sum of Squares** | **Mean of Squares** | **F-value** | **Pr(>F)** | **Significance value** |
| **Treatment** | 10 | 77577 | 7758 | 53.233 | <2.00E-16 | < 0.05 |
| **Trial** | 1 | 1540 | 1540 | 10.566 | 0.00221 | < 0.05 |
| **Treatment:Trial** | 10 | 4491 | 449 | 3.082 | 0.00473 | < 0.05 |
| **Residuals** | 44 | 6412 | 146 |  |  |  |

| **Supplementary Table 7** ANOVA of the percentage control of *Penicillium digitatum* on ‘Valencia’ fruit | | | | | | |
| --- | --- | --- | --- | --- | --- | --- |
|  | **Degrees of Freedom** | **Sum of Squares** | **Mean of Squares** | **F-value** | **Pr(>F)** | **Significance value** |
| **Treatment** | 2 | 12578 | 6289 | 22.196 | 9.28E-05 | < 0.05 |
| **Trial** | 1 | 356 | 356 | 1.255 | 0.285 | > 0.05 |
| **Treatment:Trial** | 2 | 311 | 156 | 0.549 | 0.591 | > 0.05 |
| **Residuals** | 12 | 3400 | 283 |  |  |  |
| **Supplementary Table 8** ANOVA of the extent of degreening of ‘Eureka’ lemons by day 4 | | | | | | |
|  | **Degrees of Freedom** | **Sum of Squares** | **Mean of Squares** | **F-value** | **Pr(>F)** | **Significance value** |
| **Treatment** | 5 | 46.85 | 9.371 | 49.376 | 7.47E-12 | < 0.05 |
| **Trial** | 1 | 1.56 | 1.556 | 8.200 | 0.008562 | < 0.05 |
| **Treatment:Trial** | 5 | 6.80 | 1.360 | 7.165 | 0.000315 | < 0.05 |
| **Residuals** | 24 | 4.55 | 0.190 |  |  |  |


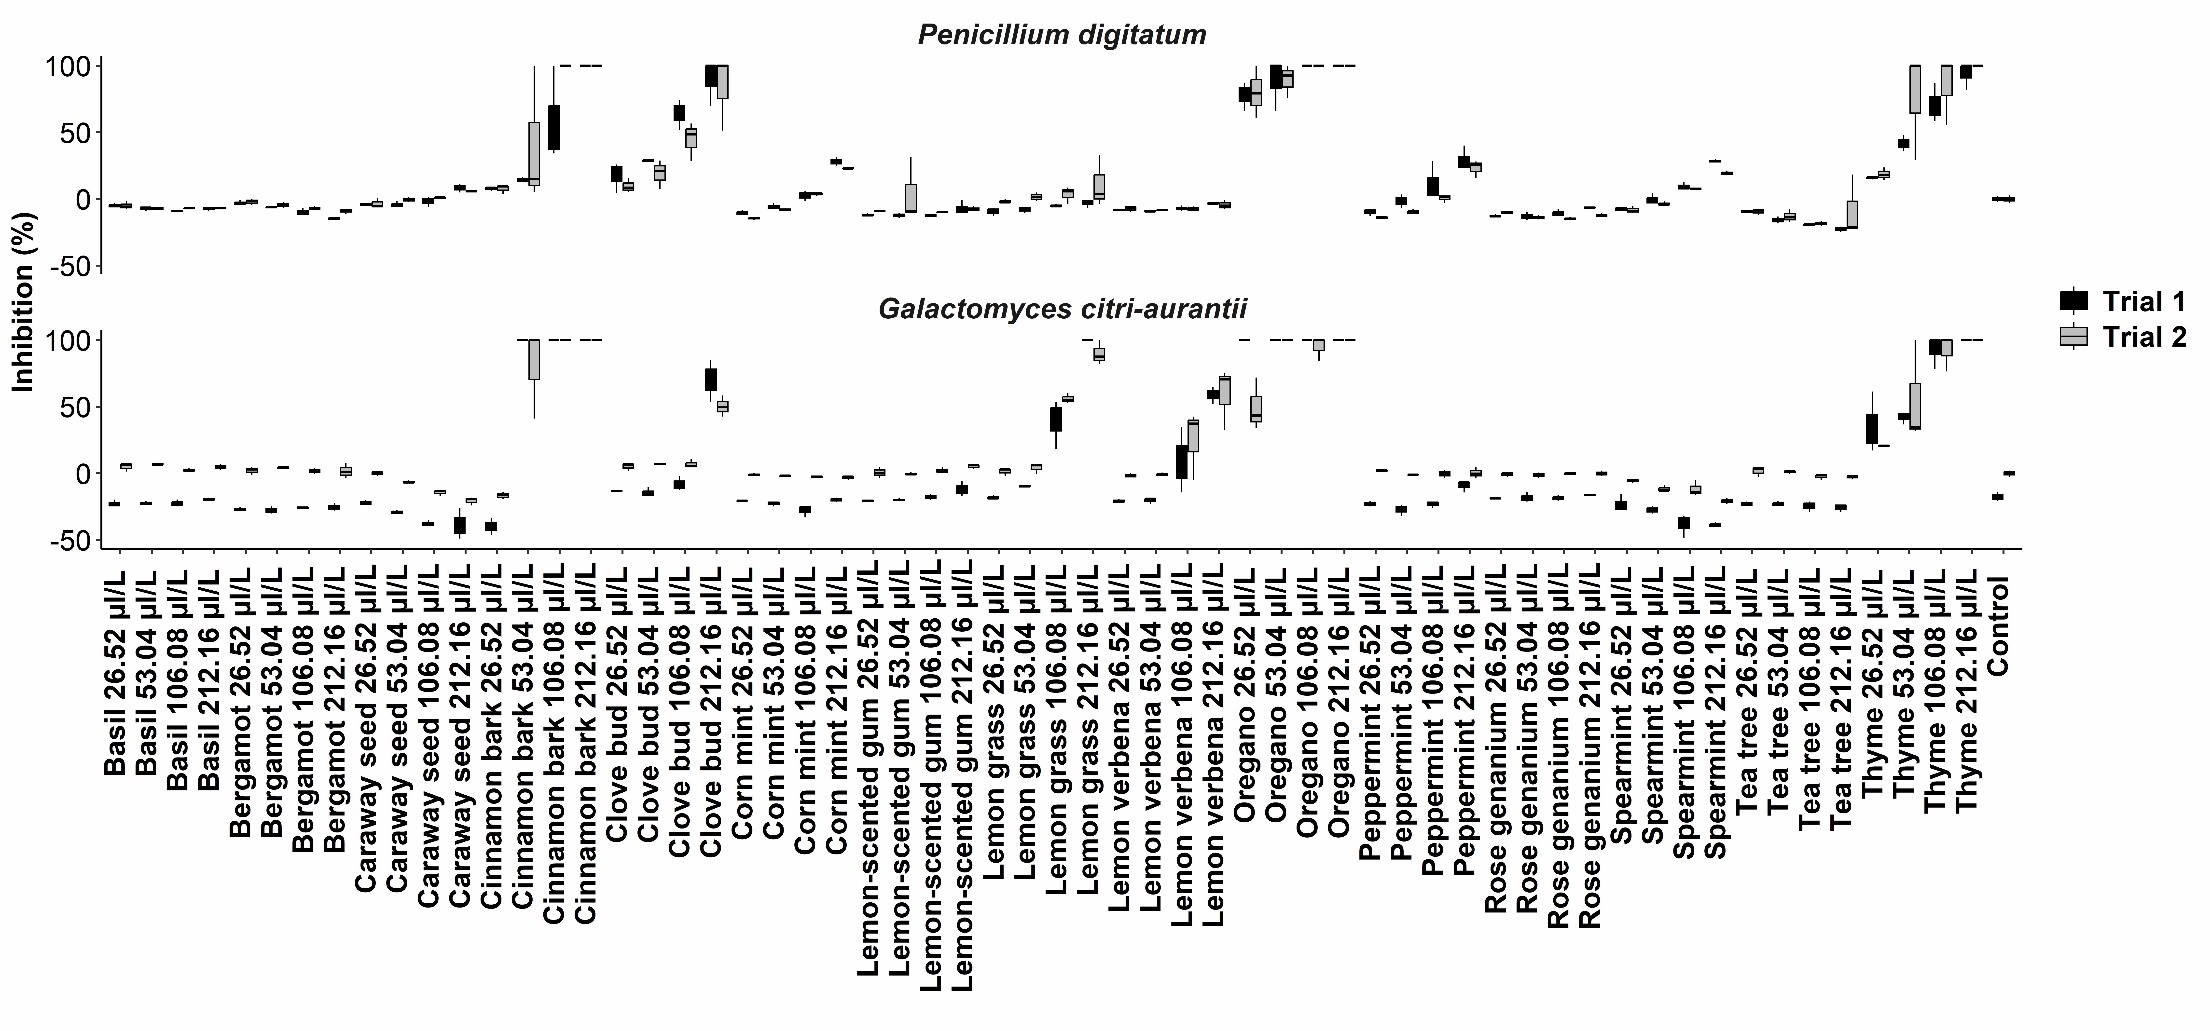
**Supplementary Fig. 1** Boxplot of trial 1 and 2 of the mycelial growth inhibition percentage of *Penicillium digitatum* and *Galactomyces citri-aurantii* as a result of essential oil volatile exposure


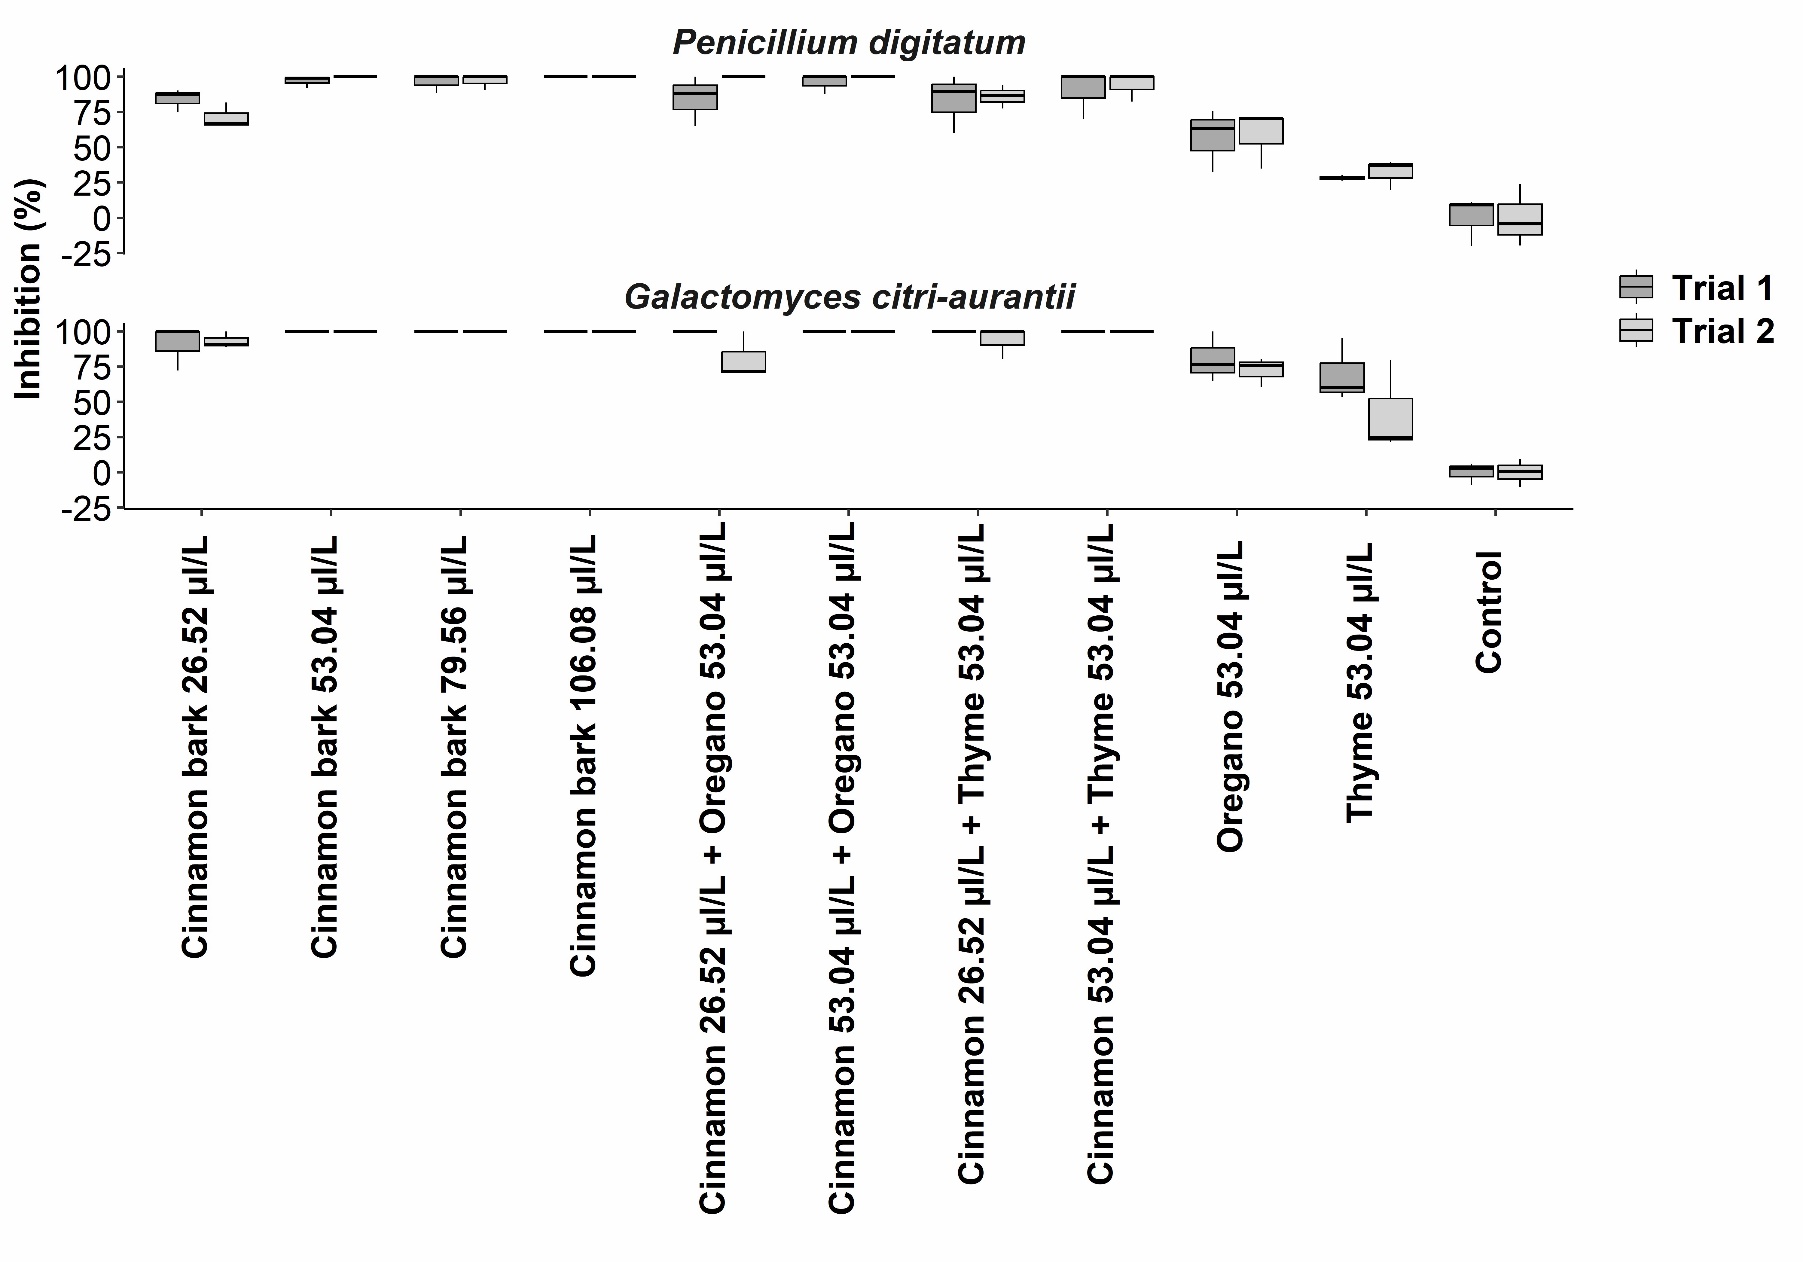
 **Supplementary Fig. 2** Boxplot of trial 1 and 2 of the spore germination inhibition percentage of *Penicillium digitatum* and *Galactomyces citri-aurantii* spores after 3 days of exposure to essential oil volatiles


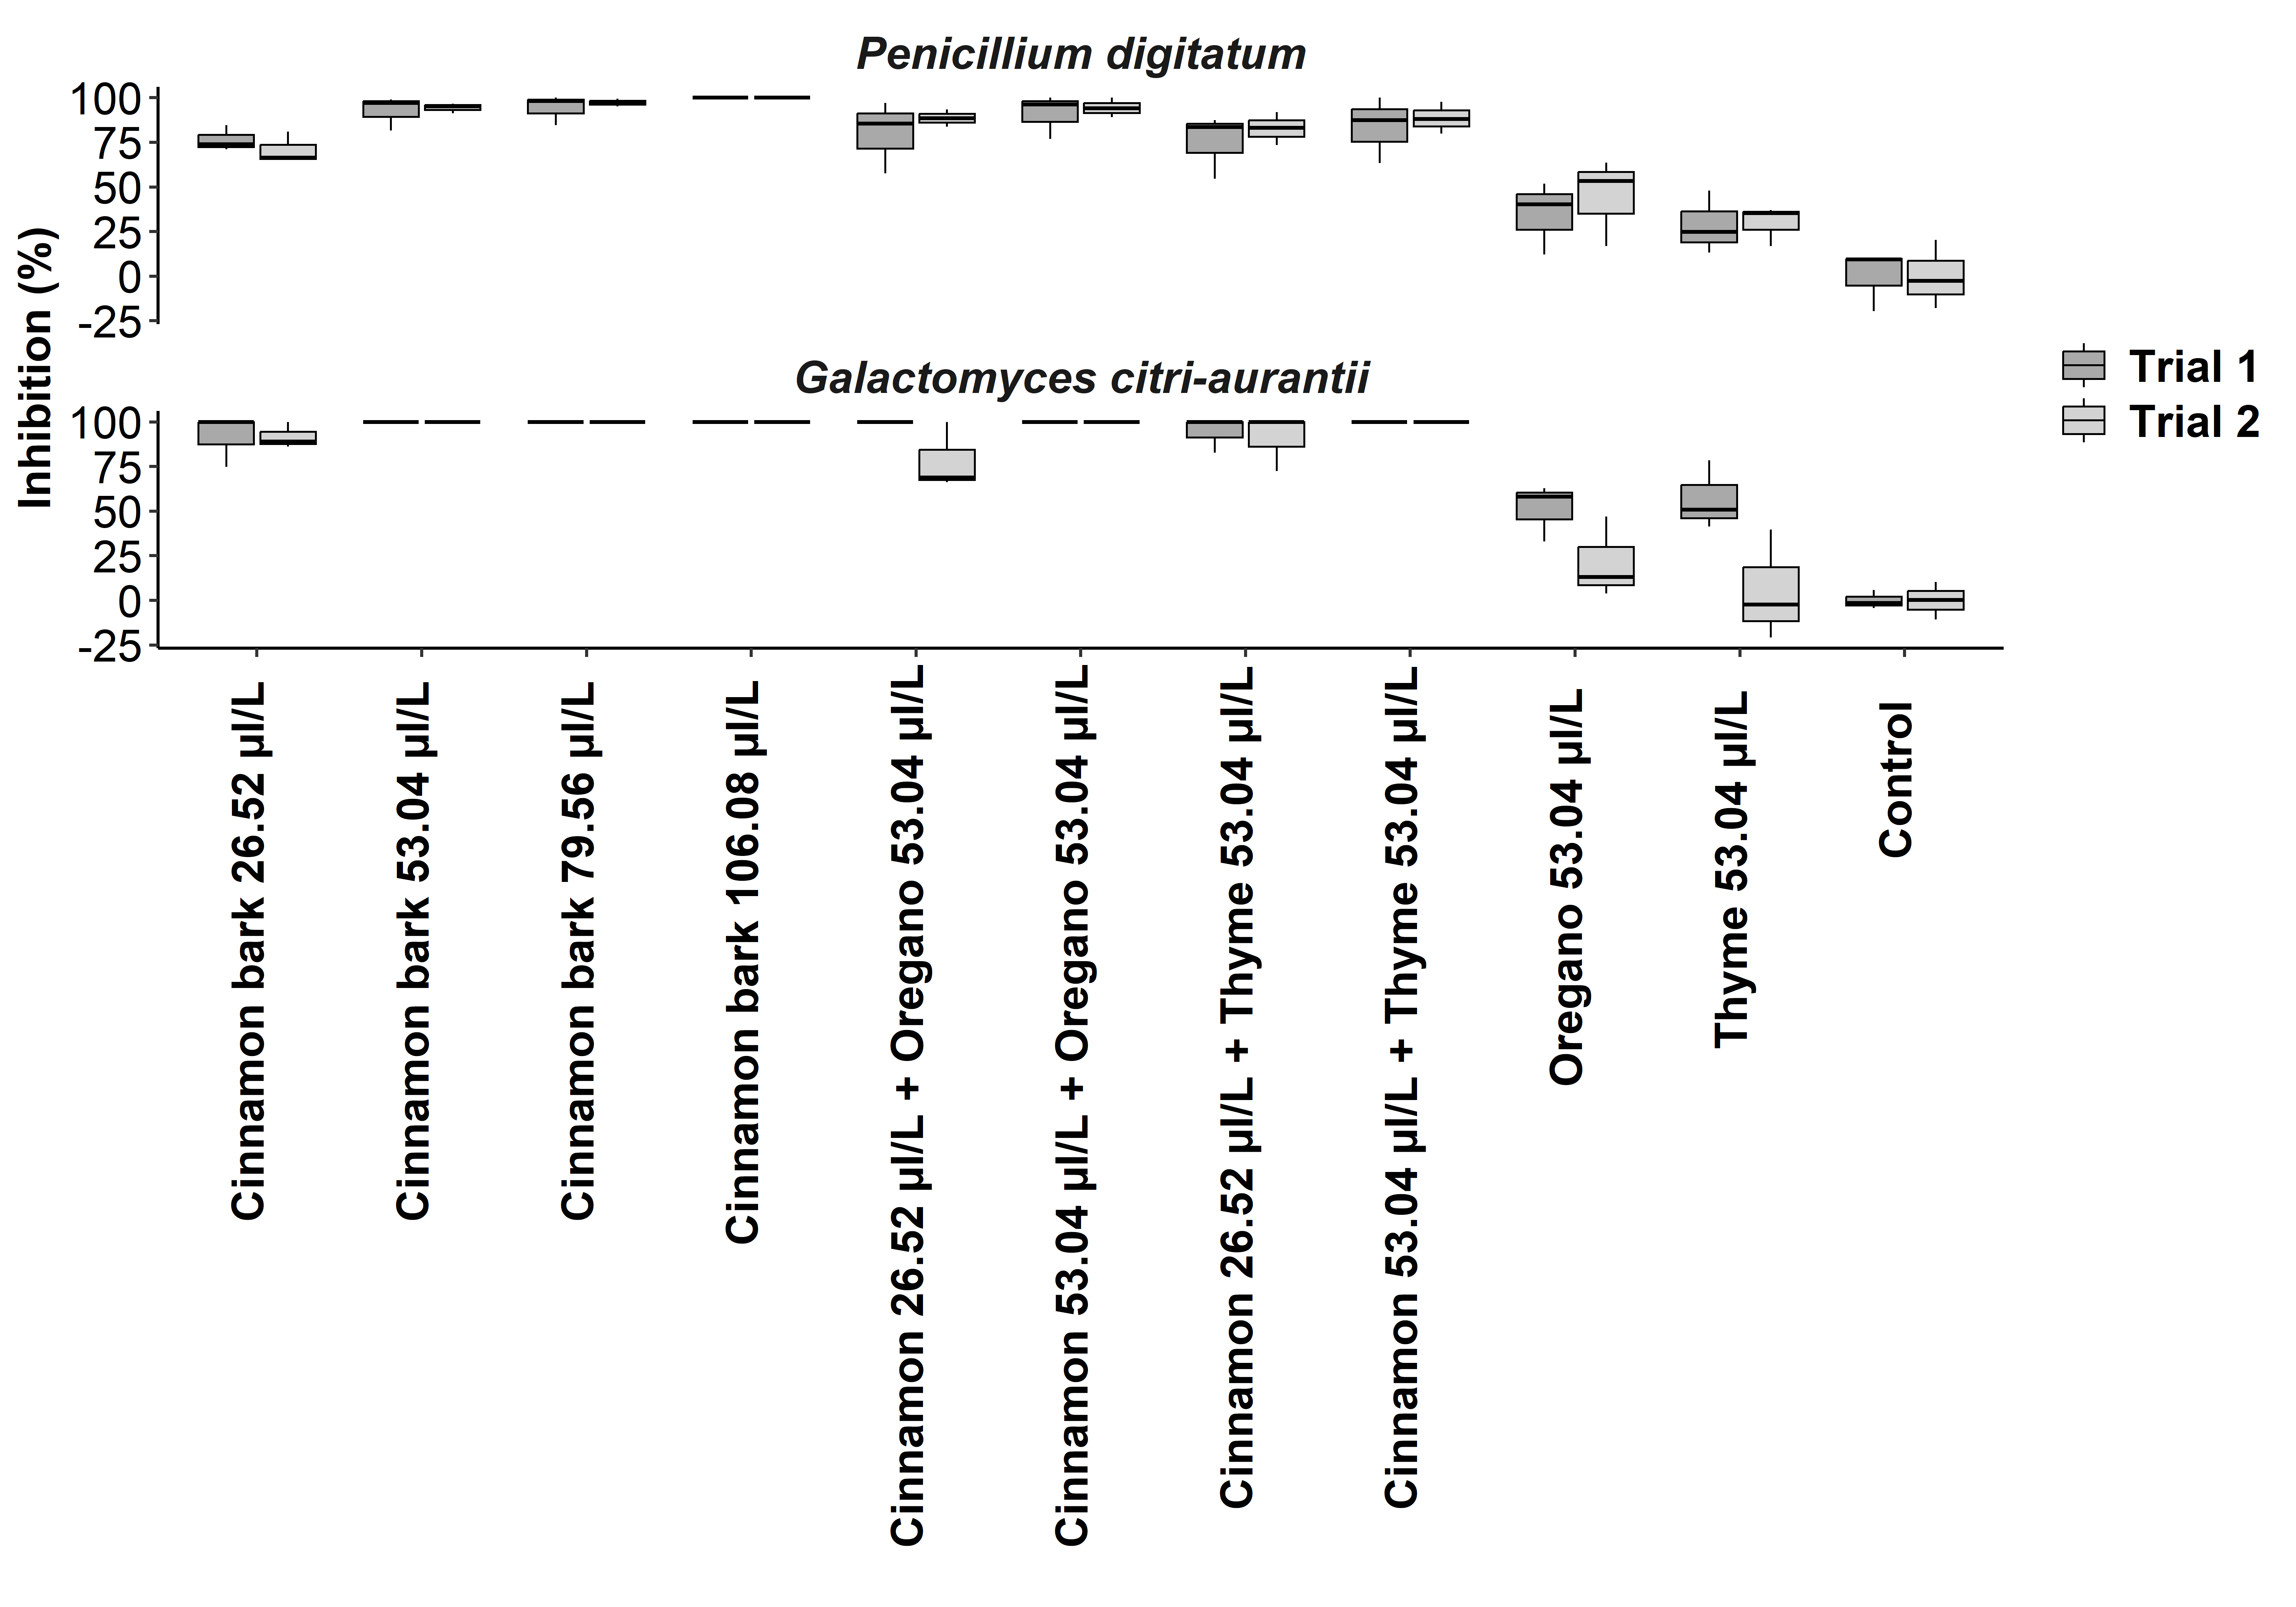
**Supplementary Fig. 3** Boxplot of trial 1 and 2 of the spore germination inhibition percentage of *Penicillium digitatum* and *Galactomyces citri-aurantii* 11 days after spores were exposed to essential oil volatiles for 3 days


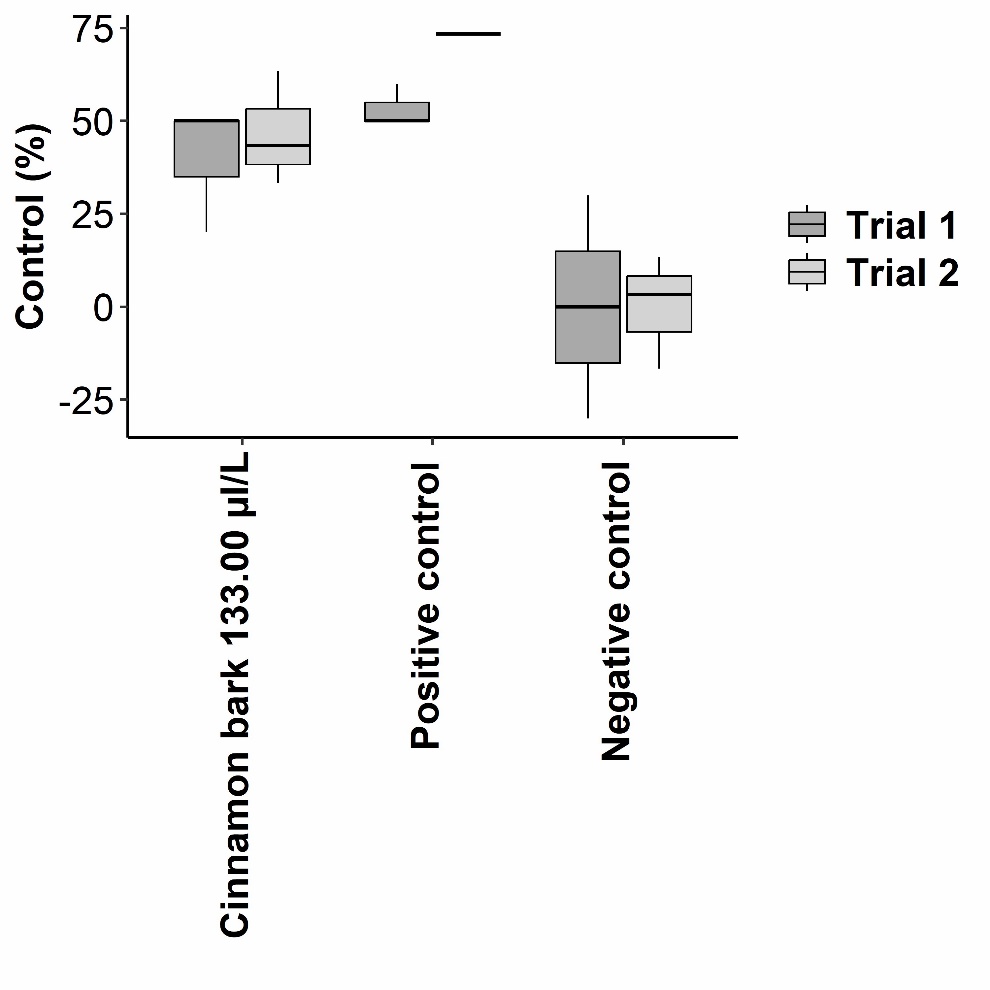


**Supplementary Fig. 4** Boxplot of trial 1 and 2 of the percentage control of *Penicillium digitatum*-infections of wound inoculated ‘Valencia’ fruit


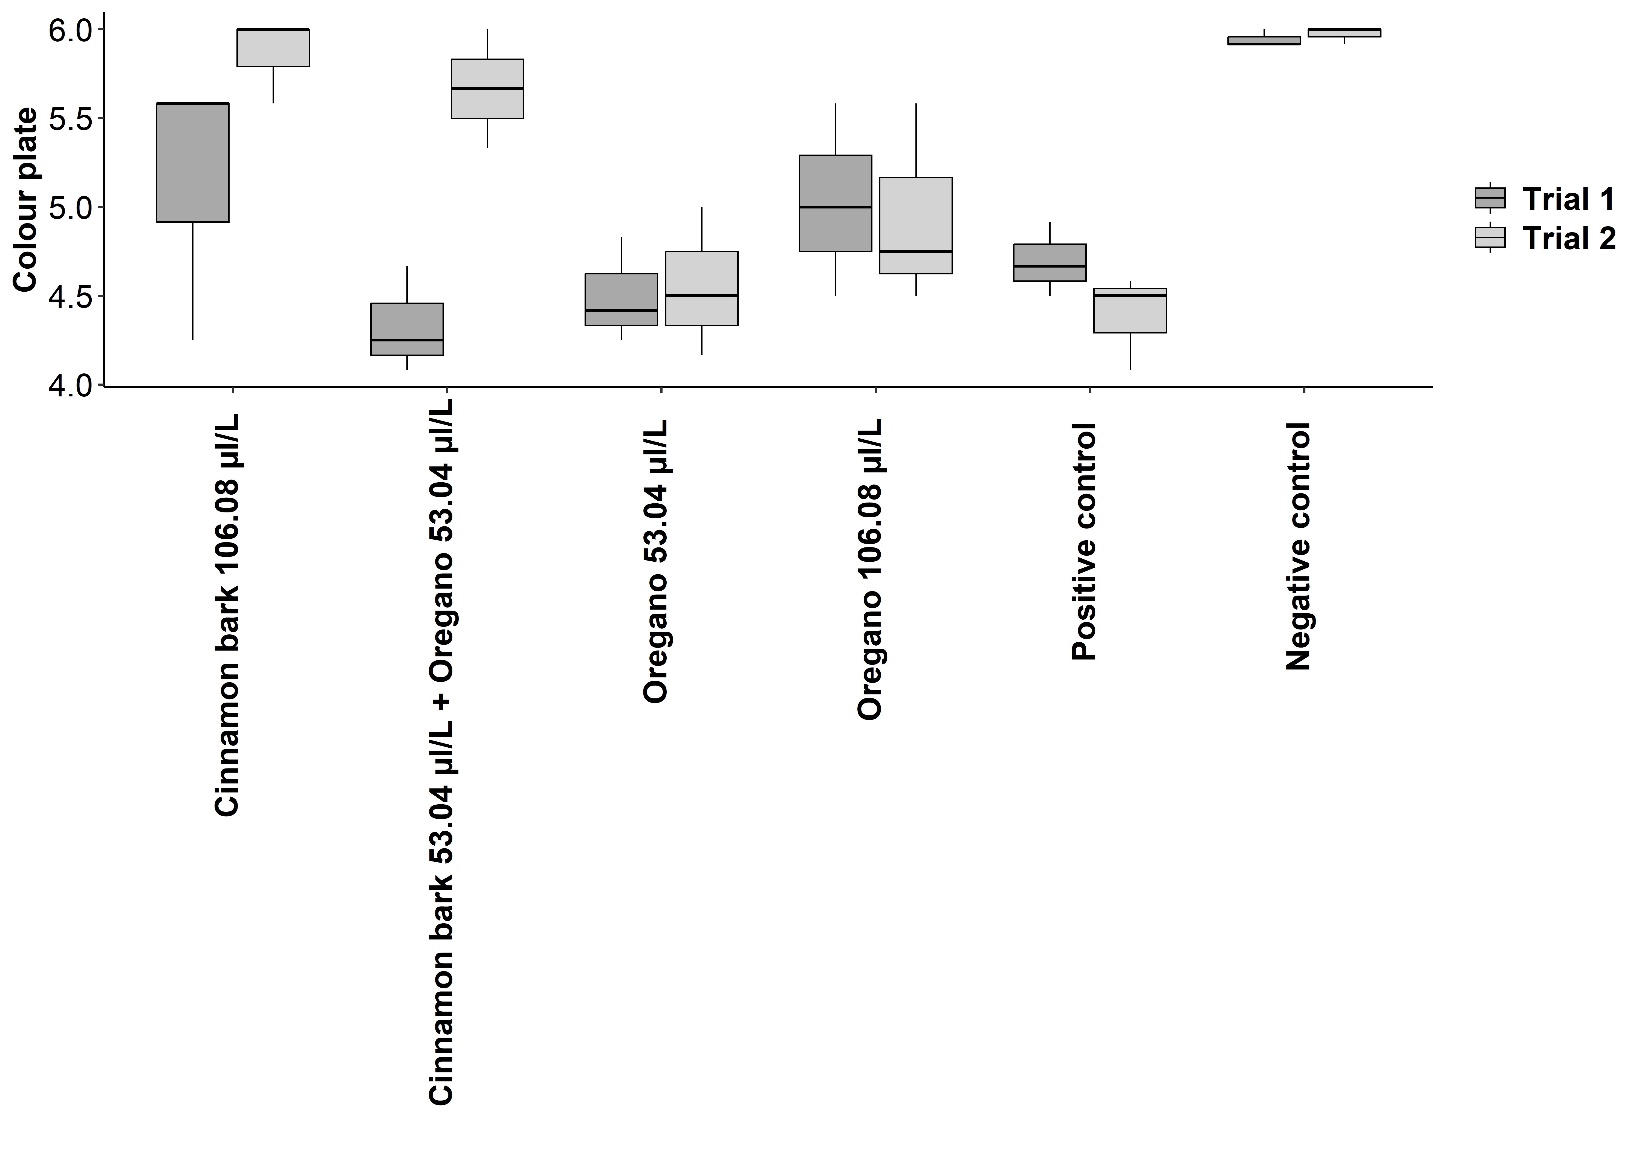


**Supplementary Fig. 5** Boxplot of trial 1 and 2 of the extent of degreening of ‘Eureka’ lemons by day 4
